# Supplementary material for: Solid-state dye-sensitized solar cell with a charge transfer layer comprising two ionic liquids and a carbon material
Source: Royal Society of Chemistry journal article supplement (doi:10.1039/c1jm11581b), 2011-01-01
Supplement: c1jm11581b.pdf [file c1jm11581b.pdf]

**Supporting Information for**  
**Solid-State Dye-Sensitized Solar Cell with a Charge Transfer**  
**Layer Comprising Two Ionic Liquids and a Carbon Material**

**Chuan-Pei Lee<sup>a</sup>, Min-Hsin Yeh<sup>a</sup>, R. Vittal<sup>a</sup>, and Kuo-Chuan Ho<sup>a,b,†</sup>**

<sup>a</sup>Department of Chemical Engineering,

National Taiwan University, Taipei 10617, Taiwan

<sup>b</sup>Institute of Polymer Science and Engineering,

National Taiwan University, Taipei 10617, Taiwan

**Figure S1** Schematic illustration for the charge transport processes in the DSSC with a carbon material-CTI.

**Figure S2** Thermogravimetric (TGA) traces of the components of the electrolytes used in this study, i.e., EMII, EMIBF<sub>4</sub>, CB, MWCNT, and SWCNT.

**Figure S3** Pictures of the binary CTIs with different weight percentages of EMIBF<sub>4</sub>.

**Figure S4** Pictures of the binary CTIs with and without carbon black, each containing 20 wt% of EMIBF<sub>4</sub>, obtained at a temperature being set at 75 °C.

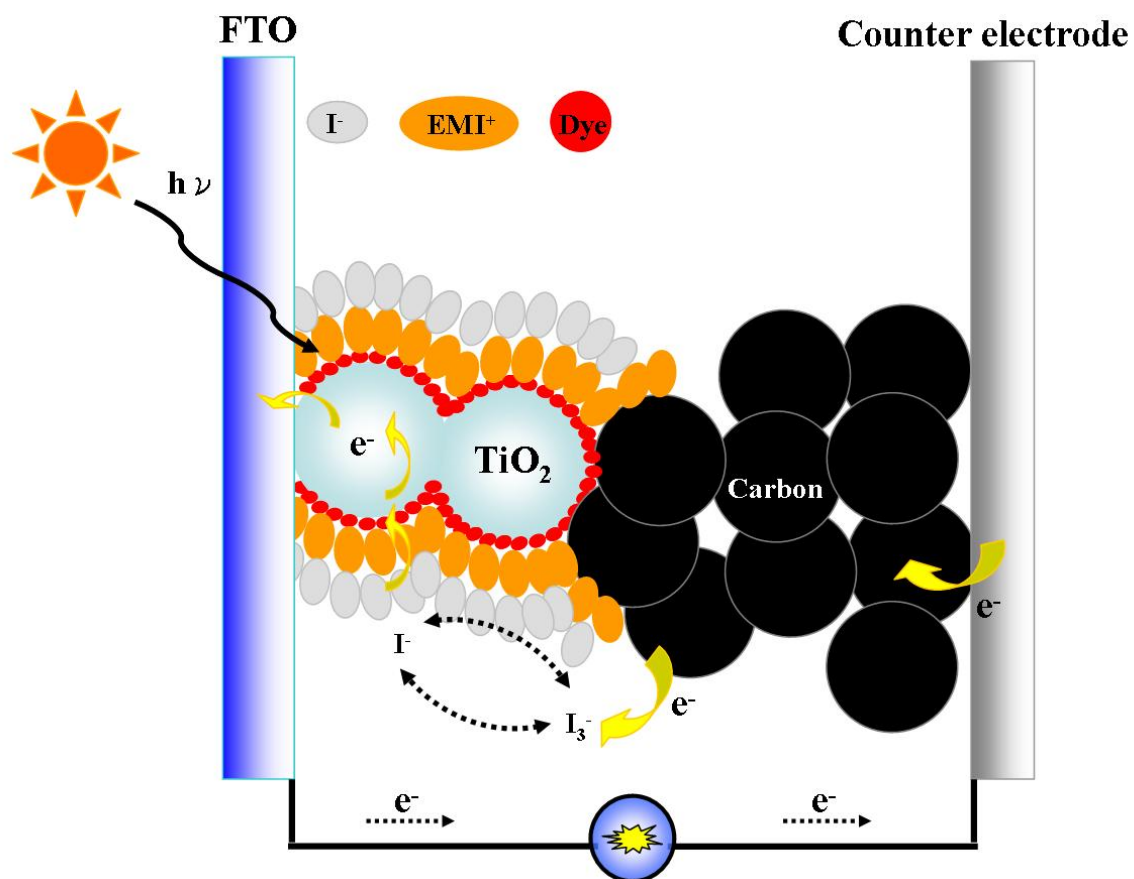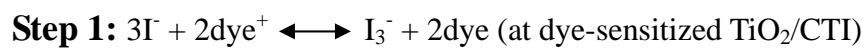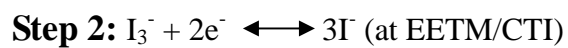

**Figure S1**

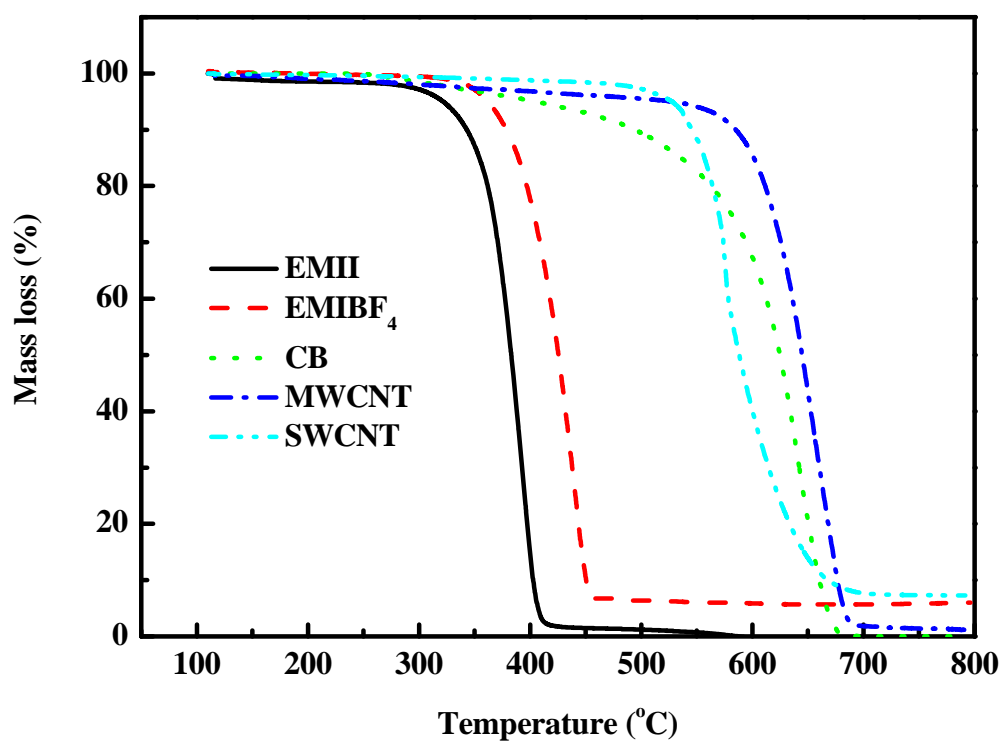

Figure S2

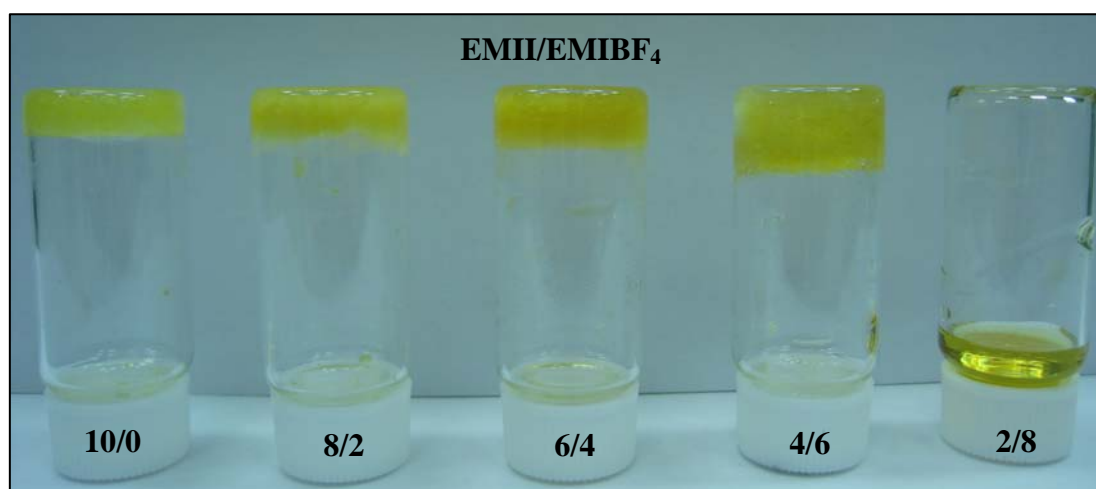

**Figure S3**

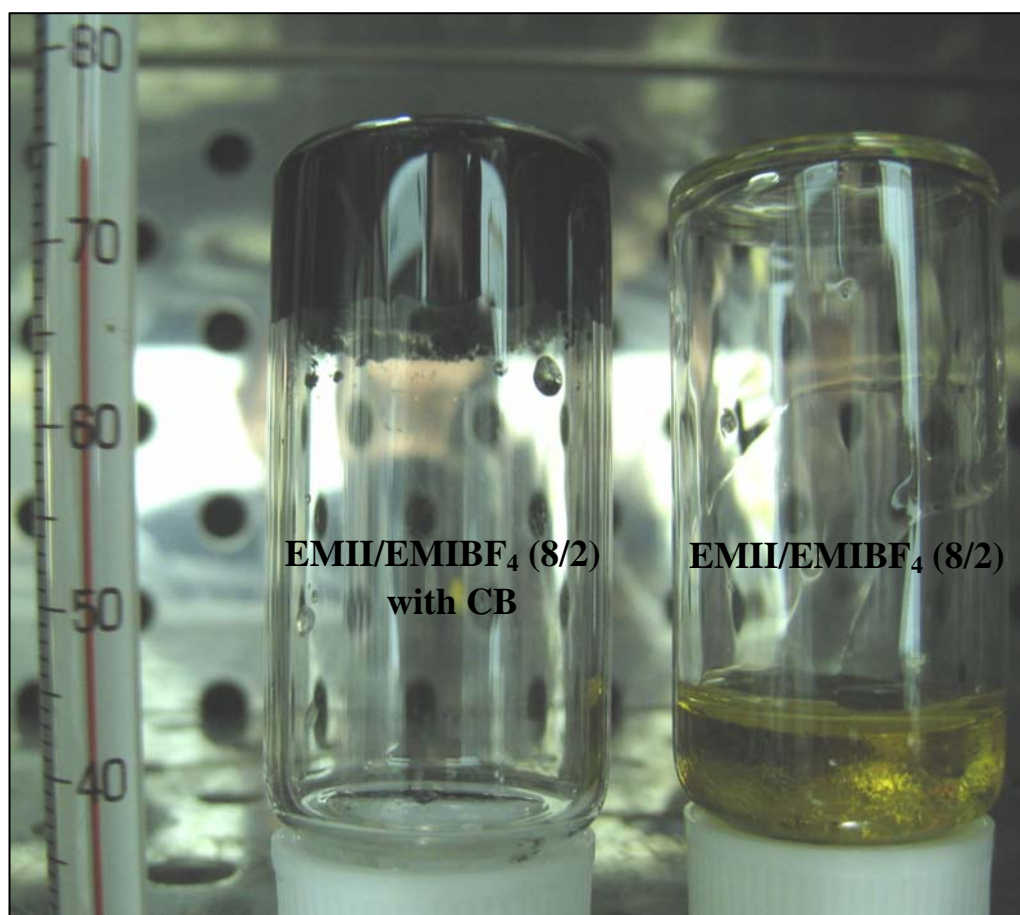

Figure S4
